# Supplementary material
Source: publisher site journal article supplement (https://www.dovepress.com/article/339274)
Supplement: Supplementary file 1 [file get_supplementary_file.php]

Supplementary Material 1: Respondent's personal basic information and main content of the questionnaire

| Gender  □Male □Female  Age  □18‑30 □31‑40□ 41‑50 □51‑60 □61‑70 □71‑80  Permanent residence  □Eastern China □Central China □Western China □(Hong Kong, Macao and Taiwan) □Foreign  Personal annual income  (RMB): □0‑20000 □20000‑50000 □50000‑150000 □150000‑500000 □ more than 500000  Focus on food safety knowledge(before the epidemic)  □Not paying attention  □Passive attention  □Active attention  Focus on food safety knowledge (during the epidemic)  □Not paying attention  □Passive attention  □Active attention  Focus on food safety knowledge (post-COVID-19)  □Not paying attention  □Passive attention  □Active attention  Food safety is a serious problem for patients with weakened immune function (such as confirmed COVID-19)  Strongly agree  Agree  Neutral or no answer  Disagree  Strongly disagree  Many of my patients may be at risk for food safety  Strongly agree  Agree  Neutral or no answer  Disagree  Strongly disagree  Ensure that patients receive food safety education  Strongly agree  Agree  Neutral or no answer  Disagree  Strongly disagree  Food safety education is part of the duties of doctors and nurses  Strongly agree  Agree  Neutral or no answer  Disagree  Strongly disagree  I want to understand the risks of food safety for my patients  Strongly agree  Agree  Neutral or no answer  Disagree  Strongly disagree  My patient is more interested in understanding and receiving food safety education than before the COVID-19 epidemic  Strongly agree  Agree  Neutral or no answer  Disagree  Strongly disagree  Educating patients on food safety will reduce foodborne illness  Strongly agree  Agree  Neutral or no answer  Disagree  Strongly disagree  My patients are better able to follow the food safety advice I provided to prevent foodborne illness than before the COVID-19 epidemic  Strongly agree  Agree  Neutral or no answer  Disagree  Strongly disagree |
| --- |
